# Supplementary material for: Nicotianamine Synthesis by OsNAS3 Is Important for Mitigating Iron Excess Stress in Rice
Source: PubMed Central journal article supplement (PMC6558524; doi:10.3389/fpls.2019.00660), 2019-06-04
Supplement: Data_Sheet_1.pdf [file Data_Sheet_1.pdf]

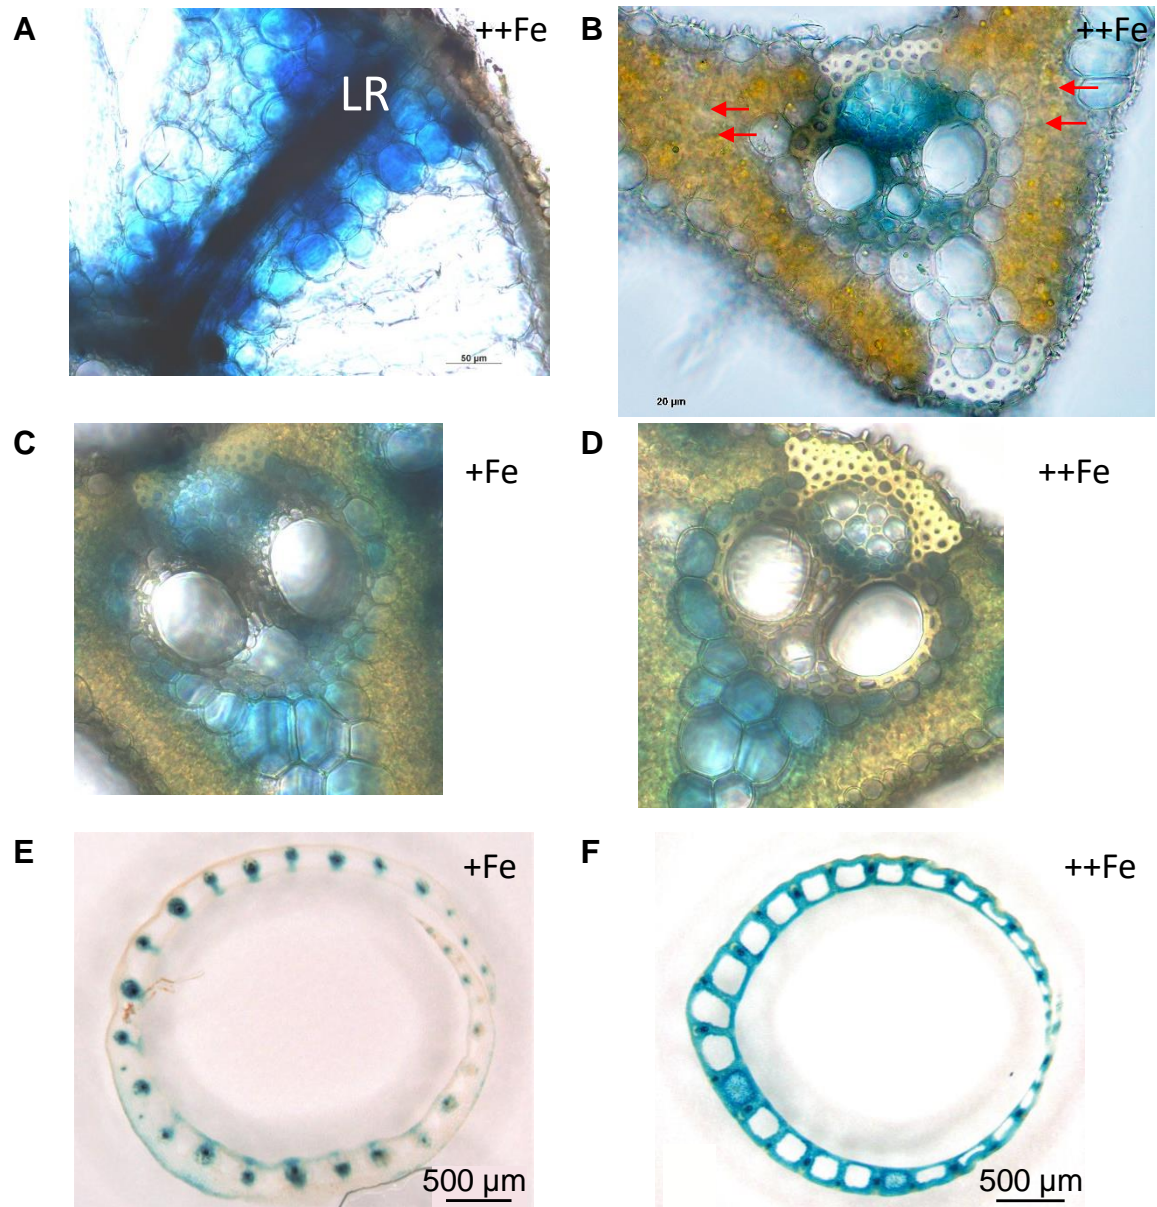

**SUPPLEMENTARY FIGURE 1** | Cellular localization of 35S promoter-OsNAS3 GUS expression in transgenic rice plants. **(A)** Lateral roots of the basal portion of mature roots under Fe excess. **(B)** Fe-excess old leaves. Red arrows, chloroplasts inside mesophyll cells. **(C)** Control newest leaf. **(D)** Fe-excess newest leaf. **(E)** Outer layer of DC in control plant. **(F)** Outer layer of Dc in Fe-excess plant. Scale bars: 20  $\mu\text{m}$  for **B,C,D**; 50  $\mu\text{m}$  for **A**; 500  $\mu\text{m}$  for **E,F**.

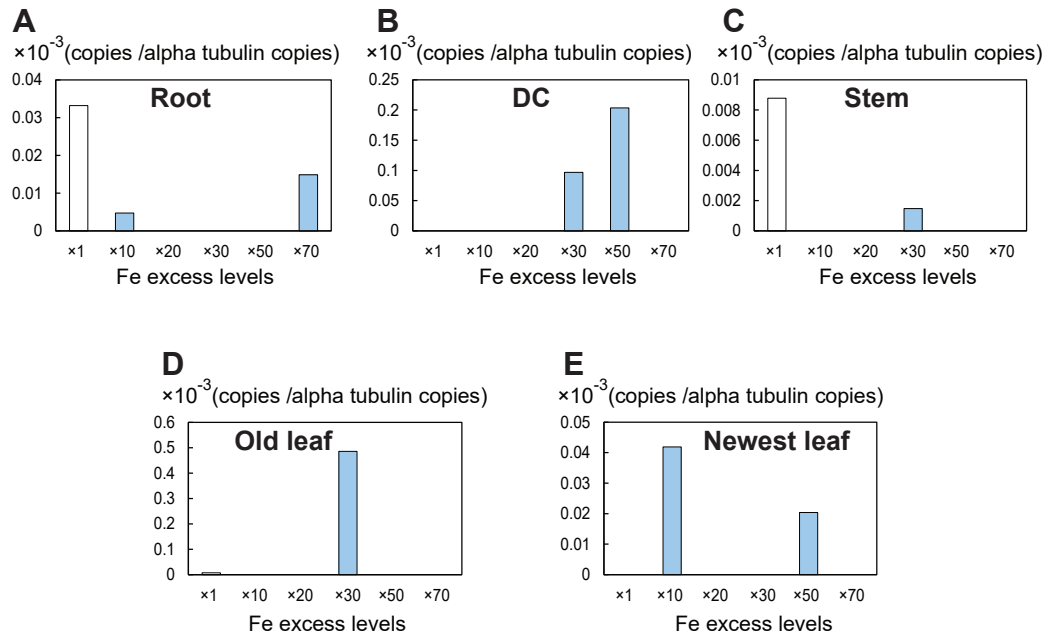

**SUPPLEMENTARY FIGURE 2** | Expression levels of the *OsNAAT1* gene in rice tissues under control and various Fe excess conditions. **(A)** Roots. **(B)** DCs. **(C)** Stems. **(D)** Old leaves. **(E)** Newest leaves. DC: discrimination center. This figure shows confirmation of the microarray results listed in Table 1 of Aung et al. (2018) from qPCR analyses. Transcript levels were normalized to the expression levels of alpha-*tubulin* determined using the primers of alpha-*Tubulin*.

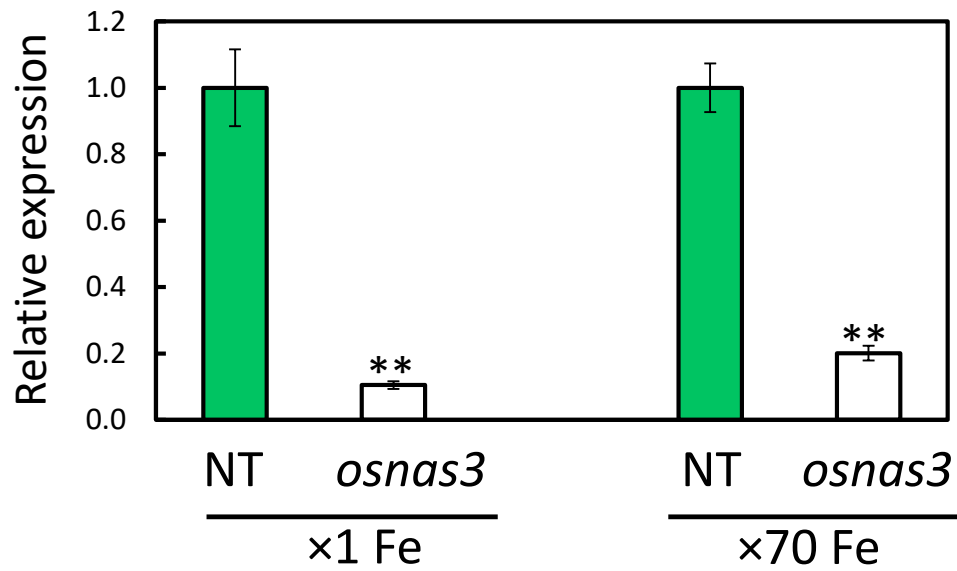

**SUPPLEMENTARY FIGURE 3** | Expression of *OsNAS3* knockout plants and NT determined through qPCR analyses. Error bars represent  $\pm 1$  SE of technical replicates,  $n = 3$ . Data were normalized to the observed expression levels of *alpha-Tubulin* and presented as relative gene expression in each tissue ( $\times 1$  Fe = 1). Asterisks above the bars indicate significant differences ( $*P < 0.05$ ;  $**P < 0.01$ ) compared to control ( $\times 1$  Fe).

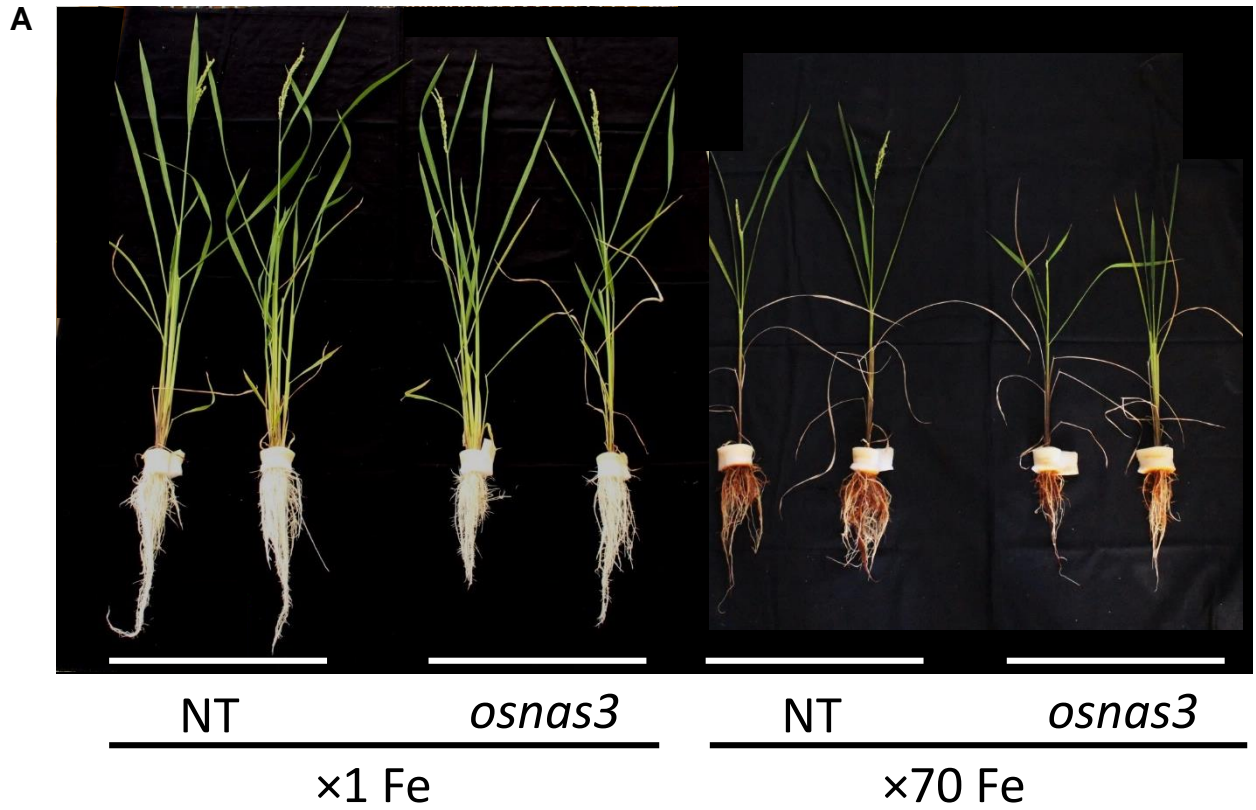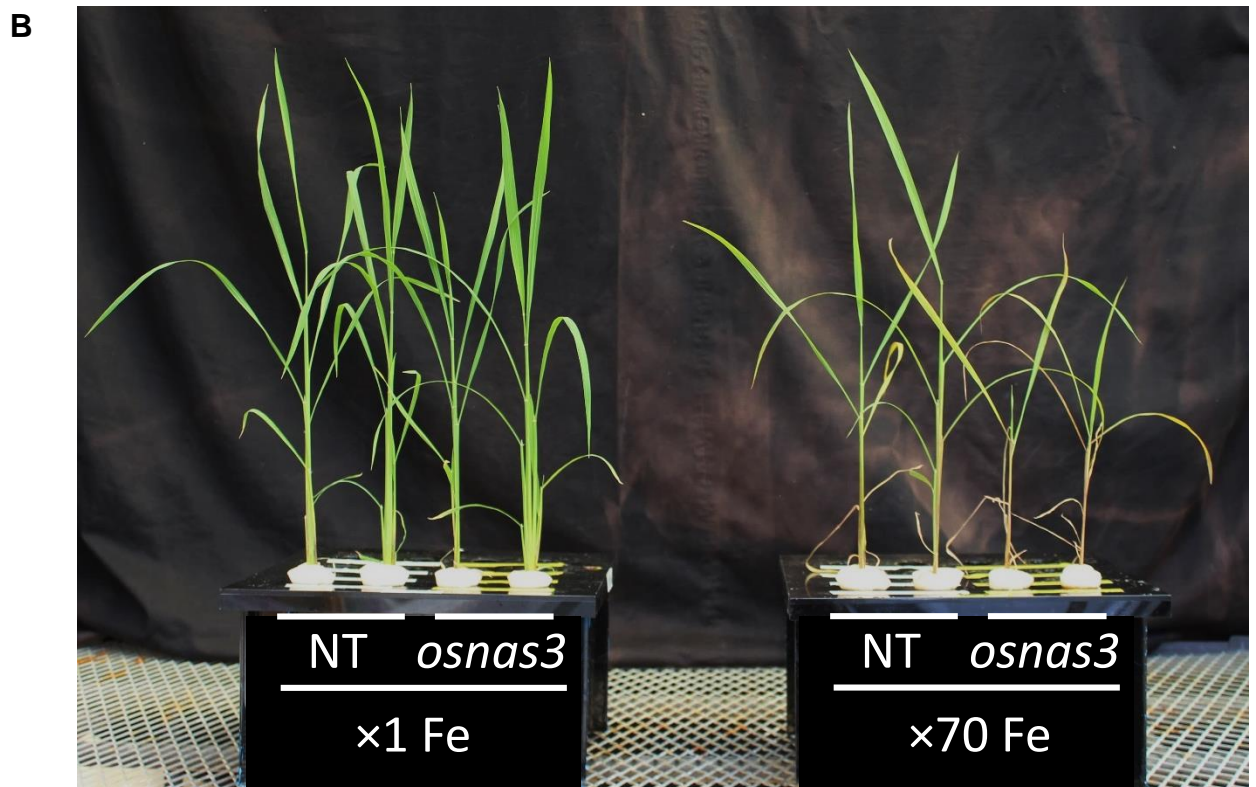

**SUPPLEMENTARY FIGURE 4** | Plant appearance of NT and *OsNAS3* knockout plants under normal and excess Fe conditions. **(A)** First experiment after 39 days of Fe excess exposure. **(B)** Second experiment after 23 days of Fe excess exposure.

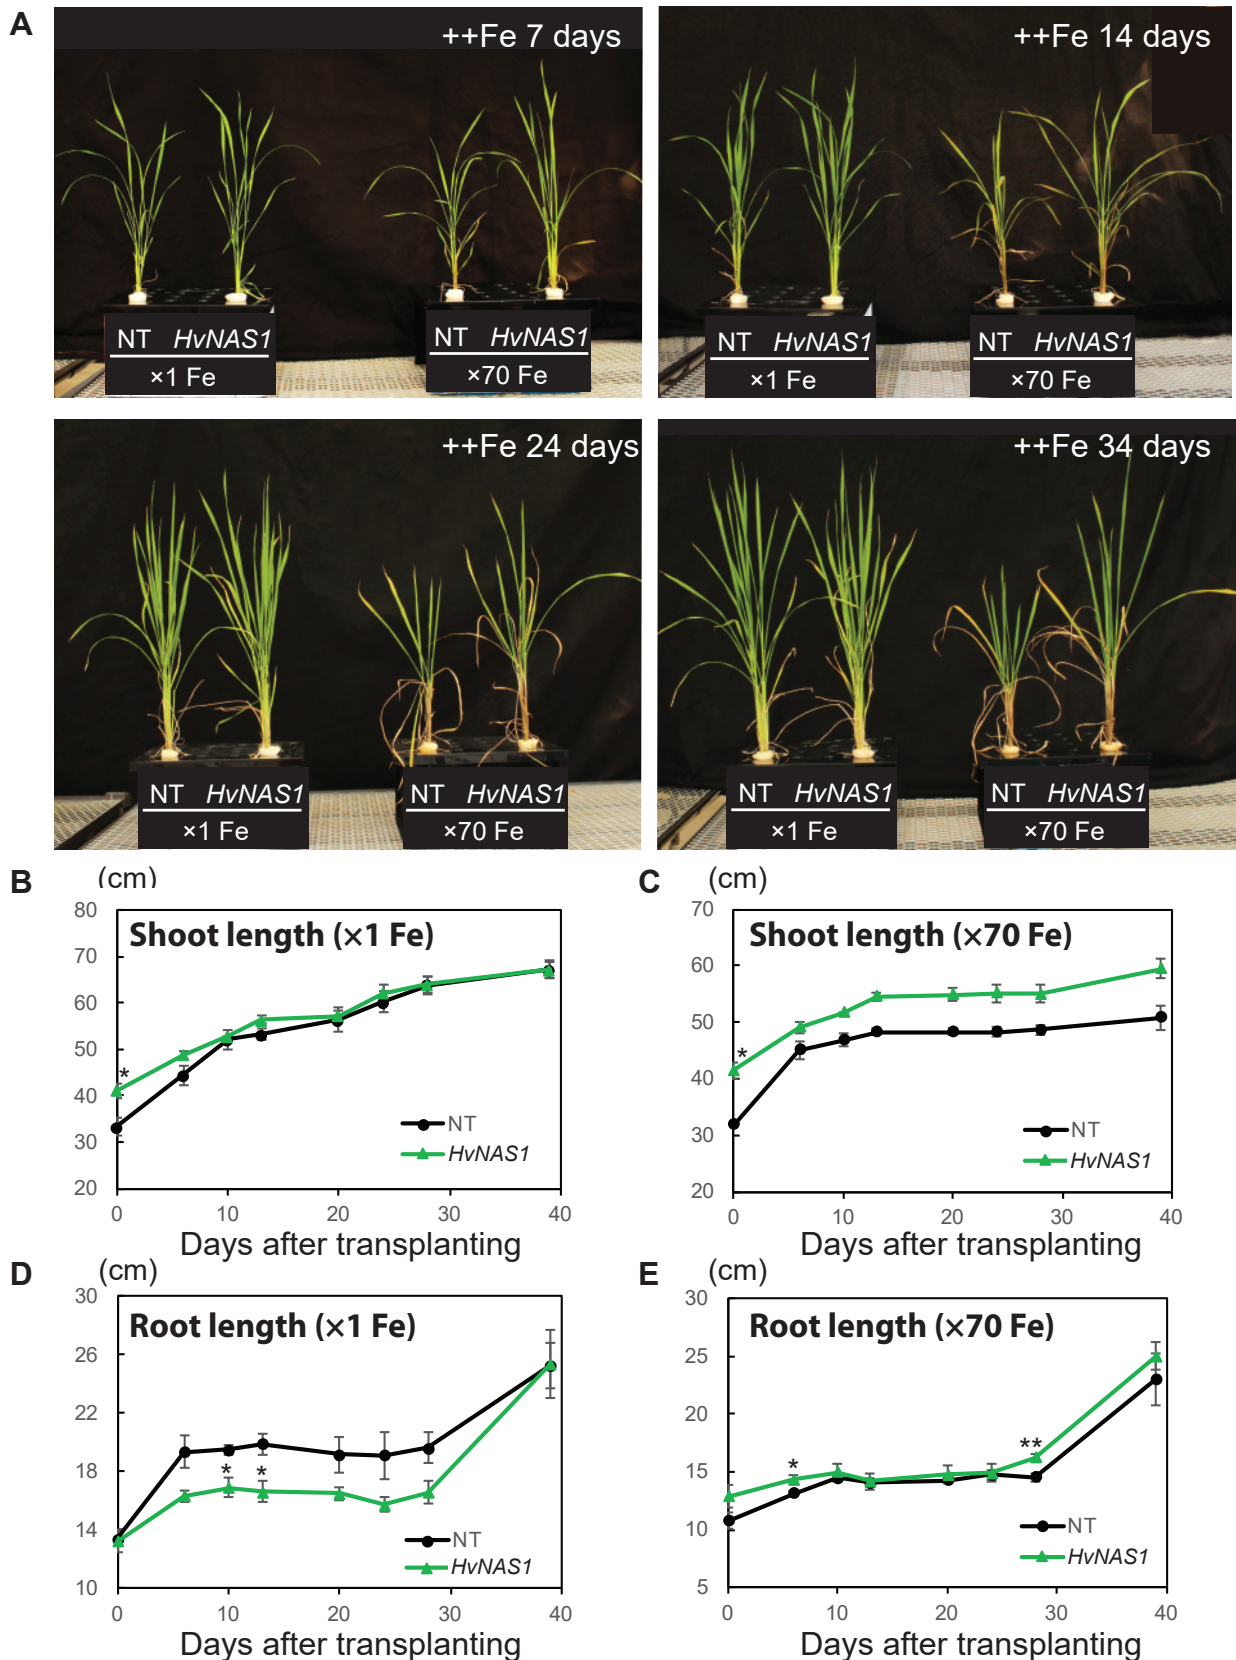

**SUPPLEMENTARY FIGURE 5** | Plant appearance and growth of elevated NA production rice and non-transformant (NT). **(A)** Appearance of NAS-overexpressing and NT plants under control or Fe excess after 7, 14, 24, and 34 days. **(B,C)** Shoot lengths and **(D,E)** Root lengths under control and excess Fe. Error bars represent the standard error (SE) of biological replicates,  $n = 4$  for NT and  $n = 3$  for overexpressing plants. Plants were grown hydroponically under control ( $\times 1$  Fe) and excess ferrous Fe ( $\times 70$  Fe) conditions at pH 4.0. Asterisks indicate significant differences compared to the NT at each time point (\* $P < 0.05$ , \*\* $P < 0.01$ ).
